# Supplementary material for: Prospective Evaluation of Kidney Function in Long-Term Survivors of Pediatric CNS Tumors
Source: MDPI journal article supplement (doi:10.3390/curroncol29080421), 2022-07-28
Supplement: s1 [file s1]

# Prospective Evaluation of Kidney Function in Long-Term Survivors of Pediatric CNS Tumors

Natalia Stepien, Viktoria Handler, Johannes Gojo, Amedeo A. Azizi, Lisa Mayr, Chryssa Grylli, Daniela Schwarz, Monika Chocholous, Irene Slavc, Michael Boehm and Andreas Peyrl

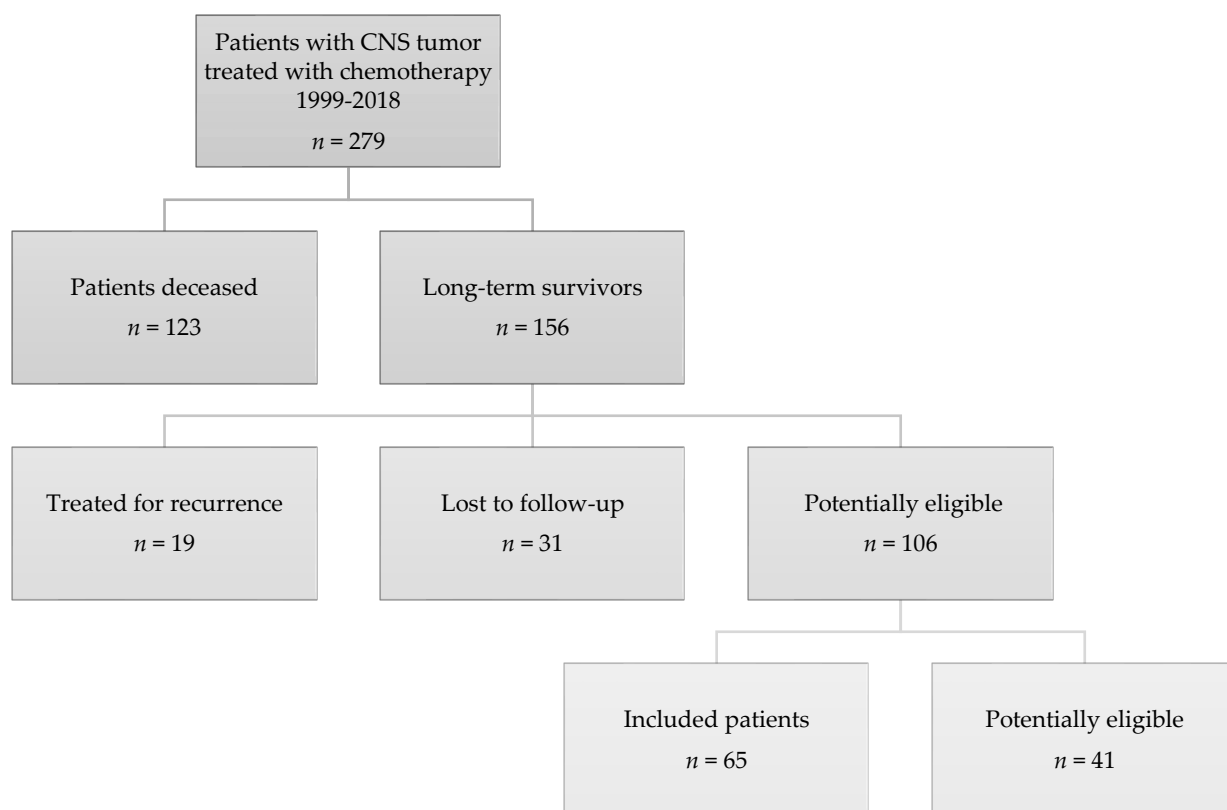

**Figure S1.** Flow chart of patient recruitment. 41 potentially eligible patients choose not to participate in the study. CNS: central nervous system.

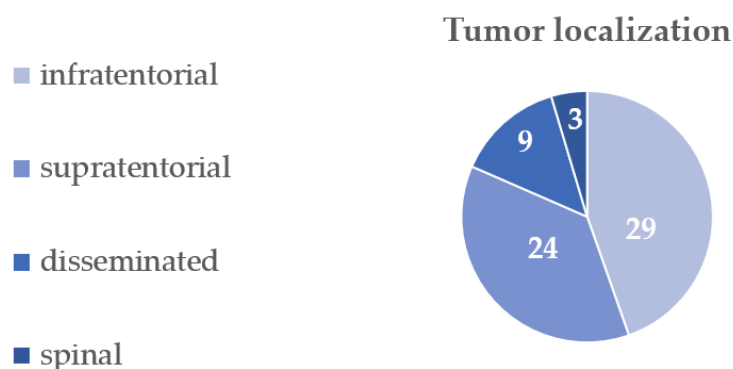

**Figure S2.** Distribution of tumor localization. Tumor localization was classified into four groups, supratentorial, infratentorial, spinal and disseminated. Tumours were included into the „disseminated“ group, if there was visible tumour on the MRI on multiple localizations. CSF positive for tumor cells was not grouped into disseminated. Classification was performed based on the initial presentation. Numbers in pie chart represent absolute patient numbers.

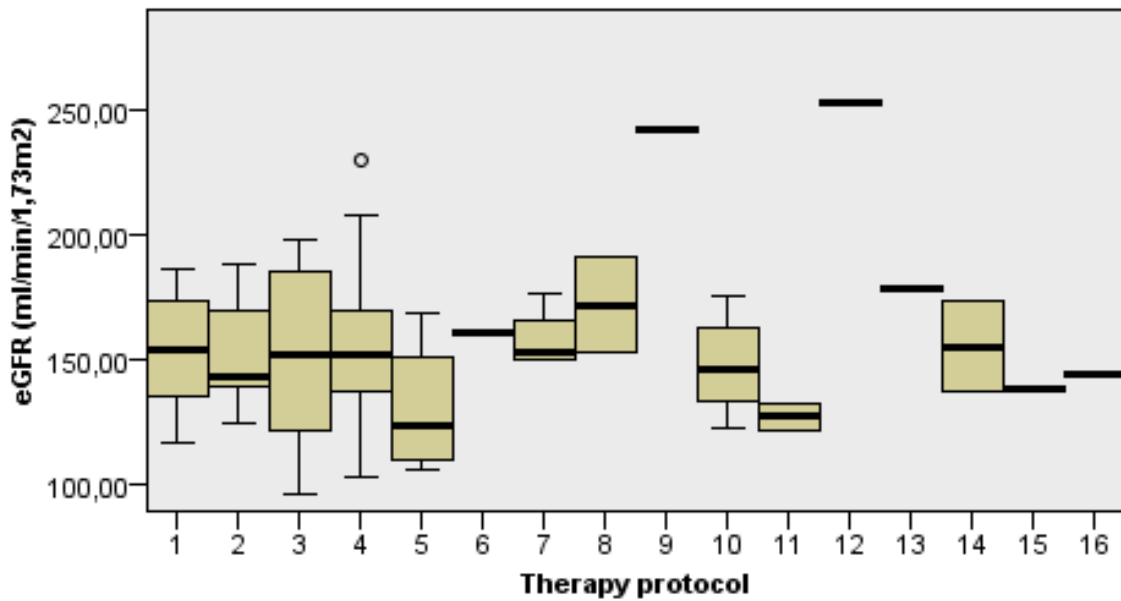

| Protocol                       | Number |
|--------------------------------|--------|
| HIT Maintainance               | 1      |
| HIT Induction                  | 2      |
| SIOP GCT 96                    | 3      |
| SIOP LGG 2004                  | 4      |
| HIT-CTx + SIOP GCT 96 + Finlay | 5      |
| HIT + Finlay                   | 6      |
| HIT + SIOP GCT 96              | 7      |
| SIOP LGG 2004 + Temozolomide   | 8      |
| SIOP Ependymoma II             | 9      |
| Temozolomide                   | 10     |
| PNET 5 MB LR                   | 11     |
| SIOP LGG 2004 + SIOP GCT 96    | 12     |
| HIT-CTx + SIOP GCT 96          | 13     |
| SIOP GCT 96 + Temozolomide     | 14     |
| HIT-CTx + Temozolomide         | 15     |
| CWS-2002P (High-Risk)          | 16     |

**Figure 3.** Correlation of therapy protocols and applied treatment protocols. Kruskal-Wallis-Test did not show any correlation between therapy protocol applied and eGFR ( $p=0.459$ ). The Table below the gives an overview of therapy combinations patients received for treatment, thereby illustrating the difficulty of further grouping.

**Table S1.** Cut-off levels for chemotherapeutic agents.

| Chemotherapeutic agent                | low                | middle                    | high               |
|---------------------------------------|--------------------|---------------------------|--------------------|
| Carboplatin (mg/m <sup>2</sup> )      | $x \leq 1800$ (12) | $1800 < x \leq 3000$ (14) | $x > 3000$ (9)     |
| CCNU (mg/m <sup>2</sup> )             | $x \leq 450$ (8)   |                           | $x > 450$ (7)      |
| Cisplatin (mg/m <sup>2</sup> )        | $x \leq 210$ (12)  | $210 < x < 400$ (14)      | $x \geq 400$ (9)   |
| Cyclophosphamide (mg/m <sup>2</sup> ) | $x \leq 4800$ (8)  |                           | $x > 4800$ (20)    |
| Etoposide (mg/m <sup>2</sup> )        | $x \leq 1000$ (7)  | $1000 < x \leq 2250$ (24) | $x > 2250$ (8)     |
| Ifosfamide (mg/m <sup>2</sup> )       | $x \leq 10000$ (5) | $10000 < x < 30000$ (13)  | $x \geq 30000$ (5) |

|                                   |               |                |
|-----------------------------------|---------------|----------------|
| Methotrexate (mg/m <sup>2</sup> ) | x ≤ 15000 (4) | x > 15000 (13) |
| Temozolomide (mg/m <sup>2</sup> ) | x < 12000 (7) | x ≥ 120000 (5) |
| Vincristine (mg/m <sup>2</sup> )  | x ≤ 13,5 (20) | x > 13,5 (27)  |

Chemotherapeutic agents administered in at least five patients and respective cut-off levels for low/middle/high dose classification as well as number of patients treated within each category. CCNU = Chlorethyl-Cyclohexyl-Nitroso-Urea or Lomustine.

**Table S2.** Overview of treatment protocols.

| Protocol [Reference]                                 | Cumulative dose per m <sup>2</sup> |
|------------------------------------------------------|------------------------------------|
| <b>HIT 91 [14]</b>                                   |                                    |
| Cisplatin                                            | 800mg                              |
| Cytarabine                                           | 2400mg                             |
| Etoposide                                            | 900mg                              |
| Ifosfamide                                           | 18g                                |
| Methotrexate                                         | 20g                                |
| Lomustine                                            | 600mg                              |
| Vincristine                                          | 36mg                               |
| <b>HIT 2000 [15]</b>                                 |                                    |
| Carboplatin                                          | 3000mg                             |
| Cyclophosphamide                                     | 12000mg                            |
| Etoposide                                            | 2250mg                             |
| MTX                                                  | 20g                                |
| Vincristine                                          | 49.5mg                             |
| Cisplatin                                            | 560mg                              |
| Lomustine                                            | 600mg                              |
| <b>HIT GBM C [16]</b>                                |                                    |
| Cisplatin                                            | 800mg                              |
| Etoposide                                            | 2400mg                             |
| Vincristine                                          | 16.5mg                             |
| Ifosfamide                                           | 52.5mg                             |
| <b>HIT HGG 2007</b>                                  |                                    |
| Temozolomide                                         | 15150mg                            |
| <b>SIOP GCT 96</b>                                   |                                    |
| Cisplatin                                            | 400mg                              |
| Etoposide                                            | 1.2g                               |
| Ifosfamide                                           | 30g                                |
| <b>SIOP LGG 2004</b>                                 |                                    |
| Carboplatin                                          | 10450mg                            |
| Vincristine                                          | 76.5mg                             |
| <b>MUV ATRT</b>                                      |                                    |
| Cyclophosphamide                                     | 7200mg                             |
| Cisplatin                                            | 300mg                              |
| Doxorubicin                                          | 180mg                              |
| Etoposide                                            | 900mg                              |
| Ifosfamide                                           | 22.5g                              |
| Methotrexate                                         | 30g                                |
| Vincristine                                          | 13.5mg                             |
| <b>High-dose chemotherapy with stem cell support</b> |                                    |
| Etoposide                                            | 1000mg                             |
| Carboplatin                                          | 2000mg                             |

**Thiotepa** **1200mg**

Prespecified cumulative chemotherapy doses of protocols administered in our cohort. Protocols and doses have been adapted according to each patient's clinical situation. Actual cumulative doses for patients with mild renal impairment are displayed in Table S3.

**Table S3.** Patient characteristics of patients with mild renal impairment.

| Patient number | Age at the time of enrollment (in years) | Sex | Diagnosis                                                   | Chemotherapeutic agents and cumulative doses used in the individual patient                                                                                                                                                                                                                                        | Irradiation | Blood pressure (mmHg) | eGFR (ml/min/1,73m <sup>2</sup> ) | Urine examination                                       |
|----------------|------------------------------------------|-----|-------------------------------------------------------------|--------------------------------------------------------------------------------------------------------------------------------------------------------------------------------------------------------------------------------------------------------------------------------------------------------------------|-------------|-----------------------|-----------------------------------|---------------------------------------------------------|
| 1              | 4                                        | m   | Germinoma                                                   | Carboplatin 2500mg/m <sup>2</sup><br>Cisplatin 180mg/m <sup>2</sup><br>Cyclophosphamide 6.4g/m <sup>2</sup><br>Etoposide 2400mg/m <sup>2</sup><br>Ifosfamide 13.5g/m <sup>2</sup><br>MTX 10g/m <sup>2</sup><br>Thiotepa 900mg/m <sup>2</sup><br>VCR 6mg/m <sup>2</sup>                                             | none        | 116/53<br>(SDS 2,36)  | 107                               | P/C: 161mg/g<br>A/C: 12mg/g                             |
| 2              | 4                                        | m   | NF1, Optic glioma, bilateral stenosis of the renal arteries | Carboplatin 9350mg/m <sup>2</sup><br>VCR 51mg/m <sup>2</sup>                                                                                                                                                                                                                                                       | none        | 130/80<br>(SDS 3,59)  | 230                               | P/C: 212mg/g                                            |
| 3              | 9                                        | f   | Ependymoma                                                  | Carboplatin 1800/m <sup>2</sup><br>Cyclophosphamide 7.2g/m <sup>2</sup><br>Etoposide 1350mg/m <sup>2</sup><br>MTX 20g/m <sup>2</sup><br>VCR 9mg/m <sup>2</sup>                                                                                                                                                     | cranial     | 115/72<br>(SDS 1,79)  | 124                               | P/C: 273mg/g<br>A/C: not evaluable                      |
| 4              | 4                                        | m   | diffuse leptomeningeal glioneuronal tumor                   | Cisplatin 440mg/m <sup>2</sup><br>Etoposide 1500mg/m <sup>2</sup><br>Ifosfamide 33000mg/m <sup>2</sup>                                                                                                                                                                                                             | none        | 111/67<br>(SDS 1,77)  | 175                               | P/C: 204 mg/g<br>A/C: 10mg/g                            |
| 5              | 7                                        | f   | Ependymoma                                                  | Carboplatin 300mg/m <sup>2</sup><br>Cyclophosphamide 12.0g/m <sup>2</sup><br>Etoposide 2250mg/m <sup>2</sup><br>MTX 30g/m <sup>2</sup><br>VCR 16.5mg/m <sup>2</sup>                                                                                                                                                | cranial     | 115/67<br>(SDS 1,81)  | 188                               | P/C 210mg/g                                             |
| 6              | 9                                        | m   | ATRT                                                        | Adriamycin 440mg/m <sup>2</sup><br>Carboplatin 4500mg/m <sup>2</sup><br>Cisplatin 175mg/m <sup>2</sup><br>Cyclophosphamide 4.6g/m <sup>2</sup><br>Etoposide 1334mg/m <sup>2</sup><br>Idarubicin 20mg/m <sup>2</sup><br>Ifosfamid 16.3g/m <sup>2</sup><br>Thiotepa 900mg/m <sup>2</sup><br>VCR 4.3mg/m <sup>2</sup> | cranial     | 109/62<br>(SDS 1,24)  | 134                               | P/C: 300mg/g<br>A/C: 49mg/g                             |
| 7              | 7                                        | m   | High-grade glioma                                           | Cisplatin 480mg/m <sup>2</sup><br>Etoposide 1800mg/m <sup>2</sup><br>Ifosfamide 7.5g/m <sup>2</sup><br>Temozolomide 3675mg/m <sup>2</sup>                                                                                                                                                                          | CNS-axis    | 89/53<br>(SDS -1,22)  | 174                               | P/C: 311<br>A/C: 60mg/g                                 |
| 8              | 5                                        | m   | Ependymoma                                                  | Carboplatin 2800mg/m <sup>2</sup><br>Cisplatin 160mg/m <sup>2</sup><br>Cyclophosphamide 11.2g/m <sup>2</sup><br>Ifosfamide 12.0g/m <sup>2</sup><br>Etoposide 2600mg/m <sup>2</sup><br>VCR 7,5mg/m <sup>2</sup>                                                                                                     | cranial     | 86/58<br>(SDS -1,71)  | 156                               | P/C 268<br>A/C <14                                      |
| 9              | 7                                        | m   | ATRT                                                        | Carboplatin 600mg/m <sup>2</sup><br>Cisplatin 660mg/m <sup>2</sup><br>Etoposid 2400mg/m <sup>2</sup><br>Ifosfamid 49,5g/m <sup>2</sup><br>VCR 1.5mg/m <sup>2</sup>                                                                                                                                                 | cranial     | 111/64<br>(SDS 1,62)  | 104                               | P/C: 147<br>A/C: 29<br>α-1<br>microglobuline:<br>26mg/L |

Table S3 displays clinical characteristics (diagnosis, pre-treatment co-morbidities, individual chemotherapy doses, type of irradiation, blood pressure) and eGFR of patients with proteinuria as a sign of mild renal impairment. f: female; m: male; NF1: Neurofibromatosis Type I; ATRT: atypical teratoid rhabdoid tumor; MTX: Methotrexate; VCR: Vincristine; SDS: standard deviation score, given for systolic blood pressure; eGFR: estimated glomerular filtration rate, calculated by the original Schwartz formula; P/C: protein/creatinine ratio in mg/g, reference value < 200mg/g; A/C: albumin/creatinine ratio reference value < 30mg/g.
